# Supplementary material for: Cisplatin plus Gemcitabine versus Gemcitabine for Biliary Tract Cancer
Source: Atypon-hosted journal article supplement (doi:10.1056/nejmoa0908721), 2010-04-07
Supplement: nejm_valle_1273sa1.pdf [file nejm_valle_1273sa1.pdf]

## Supplementary Appendix

This appendix has been provided by the authors to give readers additional information about their work.

Supplement to: Valle J, Wasan H, Palmer DH, et al. Cisplatin plus gemcitabine versus gemcitabine for biliary tract cancer. *N Engl J Med* 2010;362:1273-81.

Table of contents

|                                                                                                           |        |
|-----------------------------------------------------------------------------------------------------------|--------|
| Supplementary table 1: Reasons for treatment discontinuation (ABC-02 patients only)                       | Page 2 |
| Supplementary table 2: Treatment compliance and reasons for non-compliance for patients in the Gem arm    | Page 3 |
| Supplementary table 3: Treatment compliance and reasons for non-compliance for patients in the CisGem arm | Page 5 |
| Supplementary table 4: Tumour response for all evaluable patients, and split by tumour site               | Page 7 |

Supplementary table 1: Reasons for treatment discontinuation (ABC-02 patients only)

|                                | Treatment arm |                |
|--------------------------------|---------------|----------------|
|                                | Gem (N=162)   | CisGem (N=162) |
| Disease progression            | 49            | 26             |
| Death                          | 26            | 17             |
| Co-morbidity                   | 14            | 6              |
| Toxicity                       | 14            | 17             |
| Withdrew consent               | 8             | 8              |
| Clinician's decision           | 3             | 2              |
| Unknown                        | 4             | 7              |
| Completed treatment            | 40            | 75             |
| Never received trial treatment | 4             | 4              |

Supplementary table 2: Treatment compliance and reasons for non-compliance for patients in the Gem arm

| Cycle 1 (N=200)                      | Toxicity | Comorbid condition | Patient decision | Logistical | Evidence of PD | Non treatment death | Other   | Unknown  |
|--------------------------------------|----------|--------------------|------------------|------------|----------------|---------------------|---------|----------|
| Cycle outcome                        |          |                    |                  |            |                |                     |         |          |
| Treated as per protocol: 152 (76.0%) |          |                    |                  |            |                |                     |         |          |
| Treatment modifications: 48 (24.0%)  |          |                    |                  |            |                |                     |         |          |
| Delayed                              | 5 (2.5)  | 3 (1.5)            | 1 (0.5)          | 2 (1.0)    | 0 (0)          | 0 (0)               | 5 (2.5) | 0 (0)    |
| Reduced                              | 9 (4.5)  | 0 (0)              | 0 (0)            | 0 (0)      | 0 (0)          | 0 (0)               | 4 (2.0) | 1 (0.5)  |
| Delayed & reduced                    | 3 (1.5)  | 0 (0)              | 0 (0)            | 0 (0)      | 0 (0)          | 0 (0)               | 0 (0)   | 0 (0)    |
| Omitted                              | 5 (2.5)  | 4 (2.0)            | 1 (0.5)          | 0 (0)      | 0 (0)          | 0 (0)               | 3 (1.5) | 1 (0.5)  |
| Cycle 2 (N=187)                      |          |                    |                  |            |                |                     |         |          |
| Cycle outcome                        |          |                    |                  |            |                |                     |         |          |
| Treated as per protocol: 122 (65.2%) |          |                    |                  |            |                |                     |         |          |
| Treatment modifications: 65 (34.8%)  |          |                    |                  |            |                |                     |         |          |
| Delayed                              | 11 (5.9) | 0 (0)              | 2 (1.1)          | 6 (3.2)    | 0 (0)          | 0 (0)               | 4 (2.1) | 0 (0)    |
| Reduced                              | 9 (4.8)  | 0 (0)              | 1 (0.5)          | 0 (0)      | 0 (0)          | 0 (0)               | 2 (1.1) | 4 (2.1)  |
| Delayed & reduced                    | 7 (3.7)  | 1 (0.5)            | 0 (0)            | 0 (0)      | 0 (0)          | 0 (0)               | 1 (0.5) | 0 (0)    |
| Omitted                              | 1 (0.5)  | 2 (1.1)            | 2 (1.1)          | 0 (0)      | 2 (1.1)        | 0 (0)               | 4 (2.1) | 6 (3.2)  |
| Cycle 3 (N=176)                      |          |                    |                  |            |                |                     |         |          |
| Cycle outcome                        |          |                    |                  |            |                |                     |         |          |
| Treated as per protocol: 117 (66.5%) |          |                    |                  |            |                |                     |         |          |
| Treatment modifications: 59 (33.5%)  |          |                    |                  |            |                |                     |         |          |
| Delayed                              | 13 (7.4) | 3 (1.7)            | 0 (0)            | 3 (1.7)    | 0 (0)          | 0 (0)               | 5 (2.8) | 0 (0)    |
| Reduced                              | 4 (2.3)  | 0 (0)              | 1 (0.6)          | 0 (0)      | 0 (0)          | 1 (0.6)             | 4 (2.3) | 0 (0)    |
| Delayed & reduced                    | 2 (1.1)  | 1 (0.6)            | 0 (0)            | 0 (0)      | 0 (0)          | 0 (0)               | 2 (1.1) | 0 (0)    |
| Omitted                              | 4 (2.3)  | 2 (1.1)            | 2 (1.1)          | 0 (0)      | 1 (0.6)        | 0 (0)               | 1 (0.6) | 10 (5.7) |
| Cycle 4 (N=161)                      |          |                    |                  |            |                |                     |         |          |
| Cycle outcome                        |          |                    |                  |            |                |                     |         |          |
| Treated as per protocol: 91 (56.5%)  |          |                    |                  |            |                |                     |         |          |
| Treatment modifications: 70 (43.5%)  |          |                    |                  |            |                |                     |         |          |
| Delayed                              | 1 (0.6)  | 2 (1.2)            | 2 (1.2)          | 6 (3.7)    | 0 (0)          | 0 (0)               | 3 (1.9) | 0 (0)    |
| Reduced                              | 16 (9.9) | 0 (0)              | 1 (0.6)          | 0 (0)      | 0 (0)          | 0 (0)               | 2 (1.2) | 4 (2.5)  |
| Delayed & reduced                    | 4 (2.5)  | 0 (0)              | 0 (0)            | 1 (0.6)    | 0 (0)          | 0 (0)               | 0 (0)   | 1 (0.6)  |
| Omitted                              | 10 (6.2) | 2 (1.2)            | 2 (1.2)          | 0 (0)      | 3 (1.9)        | 0 (0)               | 6 (3.7) | 4 (2.5)  |

| Cycle 5 (N=126)                     | Toxicity  | Comorbid condition | Patient decision | Logistical | Evidence of PD | Non treatment death | Other   | Unknown |
|-------------------------------------|-----------|--------------------|------------------|------------|----------------|---------------------|---------|---------|
| Cycle outcome                       |           |                    |                  |            |                |                     |         |         |
| Treated as per protocol: 69 (54.8%) |           |                    |                  |            |                |                     |         |         |
| Treatment modifications: 57 (45.2%) |           |                    |                  |            |                |                     |         |         |
| Delayed                             | 8 (6.4)   | 1 (0.8)            | 2 (1.6)          | 6 (4.8)    | 0 (0)          | 0 (0)               | 6 (4.8) | 0 (0)   |
| Reduced                             | 11 (8.7)  | 0 (0)              | 1 (0.8)          | 0 (0)      | 0 (0)          | 0 (0)               | 2 (1.6) | 2 (1.6) |
| Delayed & reduced                   | 3 (2.4)   | 0 (0)              | 0 (0)            | 0 (0)      | 0 (0)          | 0 (0)               | 1 (0.8) | 0 (0)   |
| Omitted                             | 4 (3.2)   | 0 (0)              | 2 (1.6)          | 1 (0.8)    | 0 (0)          | 0 (0)               | 2 (1.6) | 5 (4.0) |
| Cycle 6 (N=120)                     |           |                    |                  |            |                |                     |         |         |
| Cycle outcome                       |           |                    |                  |            |                |                     |         |         |
| Treated as per protocol: 71 (59.2%) |           |                    |                  |            |                |                     |         |         |
| Treatment modifications: 49 (40.8%) |           |                    |                  |            |                |                     |         |         |
| Delayed                             | 6 (5.0)   | 1 (0.8)            | 1 (0.8)          | 6 (5.0)    | 0 (0)          | 0 (0)               | 0 (0)   | 0 (0)   |
| Reduced                             | 9 (7.5)   | 0 (0)              | 1 (0.8)          | 0 (0)      | 0 (0)          | 0 (0)               | 4 (3.3) | 3 (2.5) |
| Delayed & reduced                   | 2 (1.7)   | 0 (0)              | 0 (0)            | 0 (0)      | 0 (0)          | 0 (0)               | 1 (0.8) | 0 (0)   |
| Omitted                             | 2 (1.7)   | 2 (1.7)            | 2 (1.7)          | 0 (0)      | 2 (1.7)        | 0 (0)               | 3 (2.5) | 4 (3.3) |
| Cycle 7 (N=108)                     |           |                    |                  |            |                |                     |         |         |
| Cycle outcome                       |           |                    |                  |            |                |                     |         |         |
| Treated as per protocol: 64 (59.3%) |           |                    |                  |            |                |                     |         |         |
| Treatment modifications: 44 (40.7%) |           |                    |                  |            |                |                     |         |         |
| Delayed                             | 5 (4.6)   | 0 (0)              | 0 (0)            | 1 (0.9)    | 1 (0.9)        | 0 (0)               | 3 (2.8) | 0 (0)   |
| Reduced                             | 13 (12.0) | 1 (0.9)            | 0 (0)            | 0 (0)      | 0 (0)          | 0 (0)               | 2 (1.9) | 4 (3.7) |
| Delayed & reduced                   | 3 (2.8)   | 0 (0)              | 0 (0)            | 1 (0.9)    | 0 (0)          | 0 (0)               | 1 (0.9) | 0 (0)   |
| Omitted                             | 5 (4.6)   | 0 (0)              | 1 (0.9)          | 0 (0)      | 1 (0.9)        | 0 (0)               | 0 (0)   | 2 (1.9) |
| Cycle 8 (N=98)                      |           |                    |                  |            |                |                     |         |         |
| Cycle outcome                       |           |                    |                  |            |                |                     |         |         |
| Treated as per protocol: 52 (53.1%) |           |                    |                  |            |                |                     |         |         |
| Treatment modifications: 46 (46.9%) |           |                    |                  |            |                |                     |         |         |
| Delayed                             | 3 (3.1)   | 0 (0)              | 1 (1.0)          | 1 (1.0)    | 0 (0)          | 0 (0)               | 4 (4.1) | 0 (0)   |
| Reduced                             | 8 (8.2)   | 0 (0)              | 0 (0)            | 0 (0)      | 0 (0)          | 0 (0)               | 4 (4.1) | 5 (5.1) |
| Delayed & reduced                   | 5 (5.1)   | 0 (0)              | 0 (0)            | 0 (0)      | 0 (0)          | 0 (0)               | 0 (0)   | 0 (0)   |
| Omitted                             | 3 (3.1)   | 0 (0)              | 2 (2.0)          | 0 (0)      | 2 (2.0)        | 0 (0)               | 3 (3.1) | 5 (5.1) |

Supplementary table 3: Treatment compliance and reasons for non-compliance for patients in the CisGem arm

| Cycle 1 (N=202)                      | Toxicity  | Comorbid condition | Patient decision | Logistical | Evidence of PD | Non treatment death | Other   | Unknown |
|--------------------------------------|-----------|--------------------|------------------|------------|----------------|---------------------|---------|---------|
| Cycle outcome                        |           |                    |                  |            |                |                     |         |         |
| Treated as per protocol: 123 (60.9%) |           |                    |                  |            |                |                     |         |         |
| Treatment modifications: 79 (29.1%)  |           |                    |                  |            |                |                     |         |         |
| Delayed                              | 13 (6.4)  | 5 (2.5)            | 1 (0.5)          | 4 (2.0)    | 0 (0)          | 0 (0)               | 2 (1.0) | 0 (0)   |
| Reduced                              | 28 (13.9) | 0 (0)              | 0 (0)            | 0 (0)      | 0 (0)          | 0 (0)               | 0 (0)   | 7 (3.5) |
| Delayed & reduced                    | 0 (0)     | 0 (0)              | 0 (0)            | 0 (0)      | 0 (0)          | 0 (0)               | 1 (0.5) | 0 (0)   |
| Omitted                              | 4 (2.0)   | 2 (1.0)            | 1 (0.5)          | 0 (0)      | 2 (1.0)        | 0 (0)               | 7 (3.5) | 2 (1.0) |
| Cycle 2 (N=180)                      |           |                    |                  |            |                |                     |         |         |
| Cycle outcome                        |           |                    |                  |            |                |                     |         |         |
| Treated as per protocol: 115 (63.9%) |           |                    |                  |            |                |                     |         |         |
| Treatment modifications: 65 (36.1%)  |           |                    |                  |            |                |                     |         |         |
| Delayed                              | 5 (2.8)   | 1 (0.6)            | 4 (2.2)          | 3 (1.7)    | 0 (0)          | 0 (0)               | 8 (4.4) | 0 (0)   |
| Reduced                              | 9 (5.0)   | 0 (0)              | 0 (0)            | 0 (0)      | 0 (0)          | 0 (0)               | 1 (0.6) | 5 (2.8) |
| Delayed & reduced                    | 1 (0.6)   | 0 (0)              | 0 (0)            | 0 (0)      | 0 (0)          | 0 (0)               | 0 (0)   | 0 (0)   |
| Omitted                              | 8 (4.4)   | 4 (2.2)            | 1 (0.6)          | 2 (1.1)    | 2 (1.1)        | 2 (1.1)             | 5 (2.8) | 4 (2.2) |
| Cycle 3 (N=154)                      |           |                    |                  |            |                |                     |         |         |
| Cycle outcome                        |           |                    |                  |            |                |                     |         |         |
| Treated as per protocol: 93 (60.4%)  |           |                    |                  |            |                |                     |         |         |
| Treatment modifications: 61 (39.6%)  |           |                    |                  |            |                |                     |         |         |
| Delayed                              | 8 (5.2)   | 3 (2.0)            | 1 (0.7)          | 2 (1.3)    | 0 (0)          | 0 (0)               | 2 (1.3) | 1 (0.7) |
| Reduced                              | 14 (9.1)  | 0 (0)              | 0 (0)            | 0 (0)      | 0 (0)          | 0 (0)               | 1 (0.7) | 6 (3.9) |
| Delayed & reduced                    | 2 (1.3)   | 0 (0)              | 0 (0)            | 0 (0)      | 0 (0)          | 0 (0)               | 0 (0)   | 0 (0)   |
| Omitted                              | 6 (3.9)   | 5 (3.3)            | 0 (0)            | 0 (0)      | 1 (0.7)        | 0 (0)               | 4 (2.6) | 5 (3.3) |
| Cycle 4 (N=104)                      |           |                    |                  |            |                |                     |         |         |
| Cycle outcome                        |           |                    |                  |            |                |                     |         |         |
| Treated as per protocol: 62 (59.6%)  |           |                    |                  |            |                |                     |         |         |
| Treatment modifications: 42 (40.4%)  |           |                    |                  |            |                |                     |         |         |
| Delayed                              | 8 (7.7)   | 1 (1.0)            | 1 (1.0)          | 4 (3.9)    | 0 (0)          | 0 (0)               | 2 (1.9) | 0 (0)   |
| Reduced                              | 10 (9.6)  | 0 (0)              | 0 (0)            | 0 (0)      | 0 (0)          | 0 (0)               | 2 (1.9) | 4 (3.9) |
| Delayed & reduced                    | 3 (2.9)   | 0 (0)              | 0 (0)            | 0 (0)      | 0 (0)          | 0 (0)               | 0 (0)   | 0 (0)   |
| Omitted                              | 1 (1.0)   | 1 (1.0)            | 0 (0)            | 0 (0)      | 1 (1.0)        | 0 (0)               | 2 (1.9) | 2 (1.9) |

| Cycle 5 (N=89)                      | Toxicity | Comorbid condition | Patient decision | Logistical | Evidence of PD | Non treatment death | Other   | Unknown |
|-------------------------------------|----------|--------------------|------------------|------------|----------------|---------------------|---------|---------|
| Cycle outcome                       |          |                    |                  |            |                |                     |         |         |
| Treated as per protocol: 46 (51.7%) |          |                    |                  |            |                |                     |         |         |
| Treatment modifications: 43 (48.3%) |          |                    |                  |            |                |                     |         |         |
| Delayed                             | 5 (5.6)  | 1 (1.1)            | 3 (3.4)          | 3 (3.4)    | 0 (0)          | 0 (0)               | 4 (4.5) | 1 (1.1) |
| Reduced                             | 9 (10.1) | 0 (0)              | 0 (0)            | 0 (0)      | 0 (0)          | 0 (0)               | 0 (0)   | 3 (3.4) |
| Delayed & reduced                   | 0 (0)    | 0 (0)              | 0 (0)            | 0 (0)      | 0 (0)          | 0 (0)               | 0 (0)   | 0 (0)   |
| Omitted                             | 4 (4.5)  | 1 (1.1)            | 2 (2.3)          | 0 (0)      | 3 (3.4)        | 0 (0)               | 4 (4.5) | 0 (0)   |
| Cycle 6 (N=73)                      |          |                    |                  |            |                |                     |         |         |
| Cycle outcome                       |          |                    |                  |            |                |                     |         |         |
| Treated as per protocol: 41 (56.2%) |          |                    |                  |            |                |                     |         |         |
| Treatment modifications: 32 (43.8%) |          |                    |                  |            |                |                     |         |         |
| Delayed                             | 2 (2.7)  | 1 (1.4)            | 0 (0)            | 2 (2.7)    | 0 (0)          | 0 (0)               | 0 (0)   | 0 (0)   |
| Reduced                             | 7 (9.6)  | 0 (0)              | 0 (0)            | 0 (0)      | 0 (0)          | 0 (0)               | 0 (0)   | 4 (5.5) |
| Delayed & reduced                   | 0 (0)    | 0 (0)              | 0 (0)            | 0 (0)      | 0 (0)          | 0 (0)               | 0 (0)   | 0 (0)   |
| Omitted                             | 3 (4.1)  | 2 (2.7)            | 4 (5.5)          | 0 (0)      | 2 (2.7)        | 1 (1.4)             | 2 (2.7) | 2 (2.7) |

Supplementary table 4: Tumour response for all evaluable patients, and split by tumour site

|                                        | Treatment arm      |              | p value |
|----------------------------------------|--------------------|--------------|---------|
|                                        | Gem                | CisGem       |         |
| <b>All evaluable patients</b>          | <b>N=142</b>       | <b>N=161</b> |         |
| Complete response                      | 1 (0.7)            | 1 (0.6)      |         |
| Partial response                       | 21 (14.8)          | 41 (25.5)    |         |
| Stable disease                         | 80 (56.3)          | 89 (55.3)    |         |
| Progressive disease                    | 40 (28.2)          | 30 (18.6)    |         |
| Tumour control (CR+PR+SD)              | 102 (71.8)         | 131 (81.4)   | 0.049   |
| Difference (95% CI)                    | 9.5% (0.1, 19.0)   |              |         |
| <b>Gallbladder tumours</b>             | <b>N=56</b>        | <b>N=61</b>  |         |
| Complete response                      | 0 (0)              | 0 (0)        |         |
| Partial response                       | 12 (21.4)          | 23 (37.7)    |         |
| Stable disease                         | 31 (55.4)          | 29 (47.5)    |         |
| Progressive disease                    | 13 (23.2)          | 9 (14.8)     |         |
| Tumour control (CR+PR+SD)              | 43 (76.8)          | 52 (85.2)    | 0.242   |
| Difference (95% CI)                    | 8.5% (-5.7, 22.7)  |              |         |
| <b>Bile duct and ampullary tumours</b> | <b>N=86</b>        | <b>N=100</b> |         |
| Complete response                      | 1 (1.2)            | 1 (1.0)      |         |
| Partial response                       | 9 (10.5)           | 18 (18.0)    |         |
| Stable disease                         | 49 (57.0)          | 60 (60.0)    |         |
| Progressive disease                    | 27 (31.4)          | 21 (21.0)    |         |
| Tumour control (CR+PR+SD)              | 59 (68.6)          | 79 (79.0)    | 0.106   |
| Difference (95% CI)                    | 10.4% (-2.2, 23.0) |              |         |
